# Supplementary material for: Preparation of phosphorescent crystalline tris(1-phenylisoquinoline) iridium nanobelts via a recrystallization method
Source: Royal Society of Chemistry journal article supplement (doi:10.1039/c0nj00200c), 2010-01-01
Supplement: c0nj00200c.pdf [file c0nj00200c.pdf]

## Supplementary Information (ESI)

### Preparation of phosphorescent crystalline tris(1-phenylisoquinoline) iridium nanobelts *via* a recrystallization method

Debao Xiao,\* Haiyan Xiao, Lili Liu, and Xueling Li

Hebei Key Laboratory of Applied Chemistry, College of Environmental and Chemical Engineering, Yanshan University, 438 West Hebei Avenue, Qinhuangdao 066004, P.R. China  
E-mail: debao.xiao@ysu.edu.cn; Fax: +86 335 8061569; Tel: +86 335 8061569

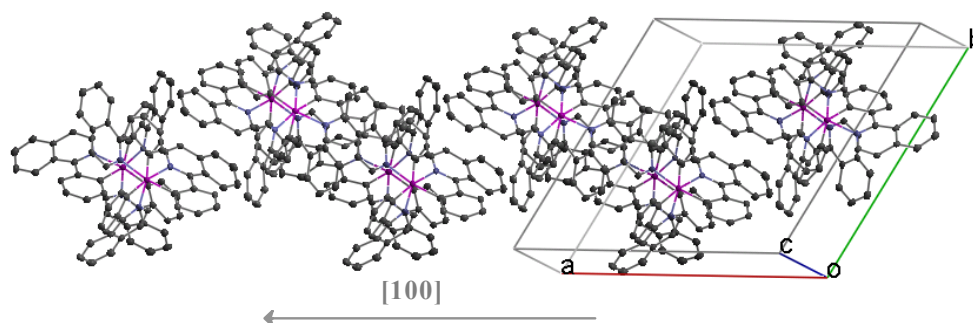

**Figure S-1.** Packing mode of Ir(piq)<sub>3</sub> molecules along (1 0 0) face in crystal cell of the single crystals and the nanobelts.

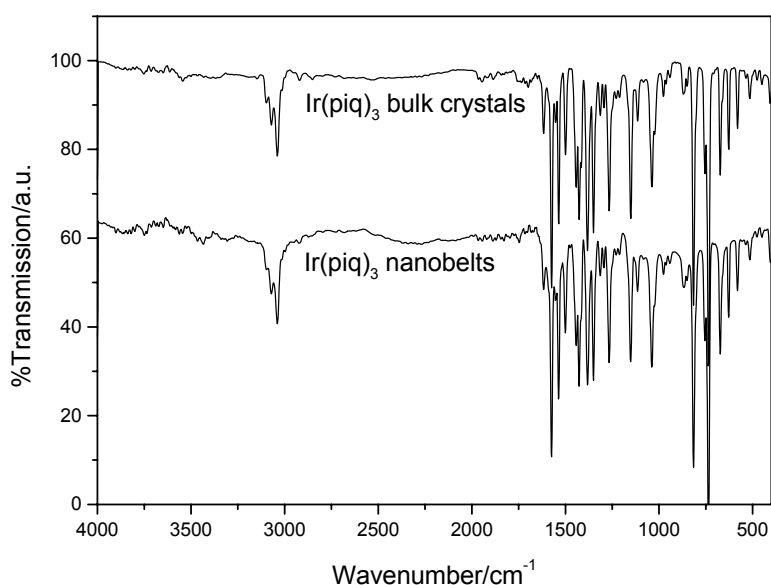

**Figure S-2.** FT-IR spectra of the as-prepared Ir(piq)<sub>3</sub> nanobelts and Ir(piq)<sub>3</sub> bulk crystals, indicating that no chemical modification of Ir(piq)<sub>3</sub> molecules occurred in the as-obtained nanobelts during the recrystallization process in hot solvent.

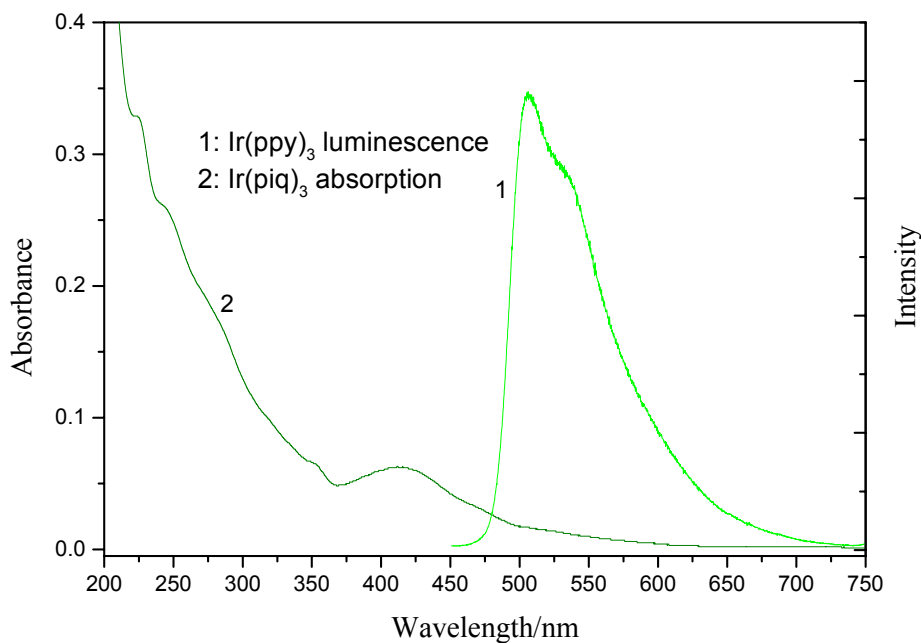

**Figure S-3a.** The existence of spectral overlap between the optical absorption of Ir(piq)<sub>3</sub> and photoluminescence of Ir(ppy)<sub>3</sub>, indicating the possibility of occurrence of resonance energy transfer from Ir(ppy)<sub>3</sub> to Ir(piq)<sub>3</sub>.

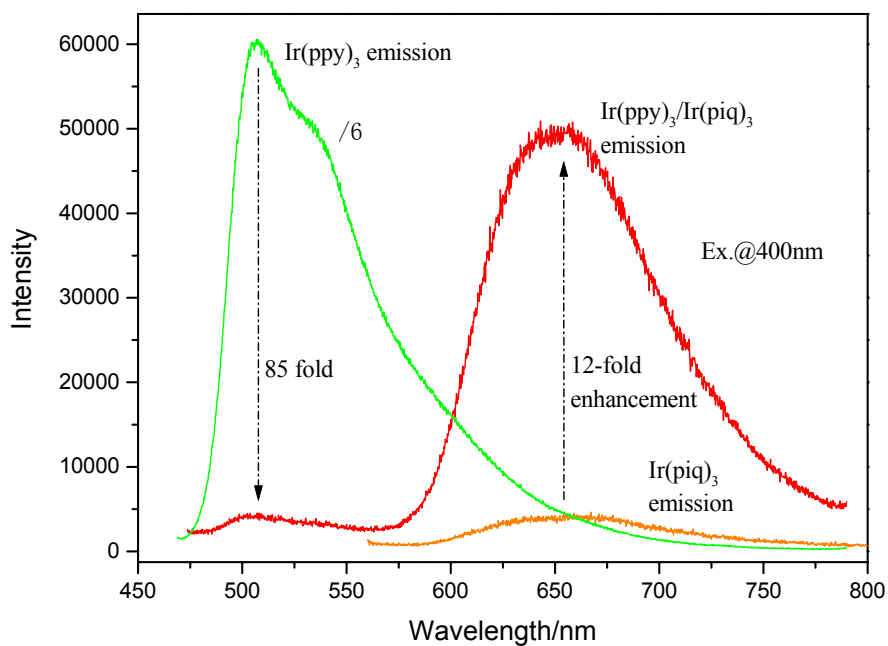

(1) Ir(ppy)<sub>3</sub>, Ir(piq)<sub>3</sub> and their doping system are all solubilized by polyvinyl alcohol (PVA) in water.

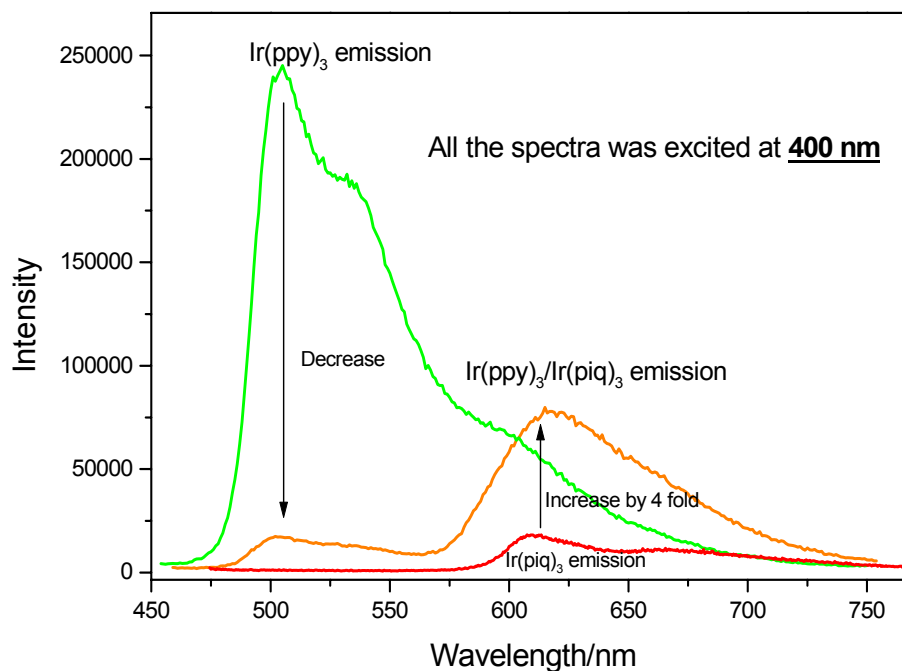

(2) Ir(ppy)<sub>3</sub>, Ir(pi q)<sub>3</sub> and their doping system are all solubilized by cetyltrimethylammonium bromide (CTAB) in water.

**Figure S-3b.** Enhanced photoluminescence of Ir(pi q)<sub>3</sub> by the resonance energy transfer from the energy donor Ir(ppy)<sub>3</sub> in the doping system of Ir(ppy)<sub>3</sub>/Ir(pi q)<sub>3</sub> solubilized by (1) PVA and (2) CTAB.

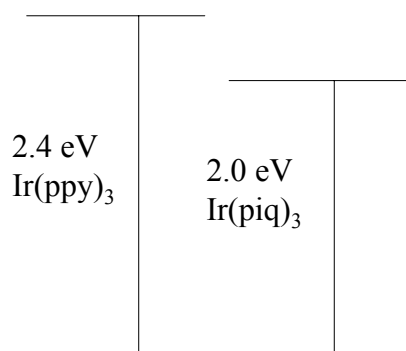

**Figure S-4.** A triplet energy level diagram has been depicted according to Ref. 19.
